# Supplementary material
Source: ML conference proceedings conference paper supplement (https://proceedings.mlr.press/v119/park20b.html)
Supplement: Supplementary file [file park20b-supp.pdf]

# Supplementary Material for Meta Variance Transfer: Learning to Augment from The Others

Seong-Jin Park<sup>1</sup> Seungju Han<sup>1</sup> Jiwon Baek<sup>1</sup> Insoo Kim<sup>1</sup> Juhwan Song<sup>1</sup> Hae Beom Lee<sup>2</sup>  
Jae-Joon Han<sup>1</sup> Sung Ju Hwang<sup>2</sup>

## 1. Detailed Network Architecture

The detailed network architectures used in our Meta Variance Transfer (MVT) are described in Table 1 and Table 2. Each table shows three networks for backbone  $\theta$ , variance transfer  $\phi$ , and manifold regularization  $\delta$ . Table 1 describes the networks based on Conv4 architecture, while Table 2 describes the deeper networks based on ResNet (He et al., 2016) architecture. For the Conv4 network, we additionally applied a max pooling to reduce the number of parameters for the final fully connected (FC) layer. Note that we used the same parameters for the FC1 and FC2 with simply applying a matrix transposition in the manifold regularization.

Table 1. Network architecture for Meta Variance Transfer using Conv4 backbone.

(a) Conv4-based backbone  $\theta$

| Layer   | Conv4 <sub>+</sub>                        |
|---------|-------------------------------------------|
| conv1   | $[3 \times 3, 32]$ , stride 2             |
| conv2   | $[3 \times 3, 32]$ , stride 2             |
| conv3   | $[3 \times 3, 32]$ , stride 2             |
| conv4   | $[3 \times 3, 32]$ , stride 2             |
| pooling | Max pooling<br>( $3 \times 3$ , stride 2) |
| FC1     | (288, 288)                                |

(b) Variance transfer network  $\phi$

| Layer     | Conv4 <sub>+</sub>   |
|-----------|----------------------|
| FC1       | (288 $\times$ 4, 32) |
| LeakyReLU | -                    |
| FC2       | (32, 288)            |

(c) Manifold regularization  $\delta$

| Layer             | Conv4 <sub>+</sub> |
|-------------------|--------------------|
| FC1- $W_\delta$   | (288, 32)          |
| FC2- $W_\delta^T$ | (32, 288)          |

<sup>\*</sup>Equal contribution <sup>1</sup>Samsung Advanced Institute of Technology <sup>2</sup>KAIST. Correspondence to: Sung Ju Hwang <sjhwang82@kaist.ac.kr>.

Table 2. Network architecture for Meta Variance Transfer using ResNet backbone.

(a) ResNet-based backbone  $\theta$

| Layer   | ResNet-10 <sub>+</sub>                                                          | ResNet-34 <sub>+</sub>                                                          |
|---------|---------------------------------------------------------------------------------|---------------------------------------------------------------------------------|
| conv1   | $[7 \times 7, 64]$ , stride 2                                                   |                                                                                 |
| pool1   | $3 \times 3$ max pool, stride 2                                                 |                                                                                 |
| conv2   | $\begin{bmatrix} 3 \times 3, 64 \\ 3 \times 3, 64 \end{bmatrix} \times 1$       | $\begin{bmatrix} 3 \times 3, 64 \\ 3 \times 3, 64 \end{bmatrix} \times 3$       |
| conv3   | $\begin{bmatrix} 3 \times 3, 128 \\ 3 \times 3, 128 \end{bmatrix} \times 1, s2$ | $\begin{bmatrix} 3 \times 3, 128 \\ 3 \times 3, 128 \end{bmatrix} \times 4, s2$ |
| conv4   | $\begin{bmatrix} 3 \times 3, 256 \\ 3 \times 3, 256 \end{bmatrix} \times 1, s2$ | $\begin{bmatrix} 3 \times 3, 256 \\ 3 \times 3, 256 \end{bmatrix} \times 6, s2$ |
| conv5   | $\begin{bmatrix} 3 \times 3, 512 \\ 3 \times 3, 512 \end{bmatrix} \times 1, s2$ | $\begin{bmatrix} 3 \times 3, 512 \\ 3 \times 3, 512 \end{bmatrix} \times 3, s2$ |
| pooling | Global Average Pooling                                                          |                                                                                 |
| FC1     | (512, 512)                                                                      |                                                                                 |

(b) Variance transfer network  $\phi$

| Layer     | ResNet <sub>+</sub>  |
|-----------|----------------------|
| FC1       | (512 $\times$ 4, 64) |
| LeakyReLU | -                    |
| FC2       | (64, 512)            |

(c) Manifold regularization  $\delta$

| Layer             | ResNet <sub>+</sub> |
|-------------------|---------------------|
| FC1- $W_\delta$   | (512, 64)           |
| FC2- $W_\delta^T$ | (64, 512)           |

## 2. Decoder Architecture for Visualization

The decoder architecture used in our experiment for the proof of concept is described in Table 3. Given pre-trained backbone network from our MVT meta-training, we trained the decoder by feeding the feature embedding  $e$  and reconstructing the original  $112 \times 112$  input facial images. For each convolutional block, instead of deconvolution, we used a  $2 \times$  upsampling by nearest neighbor interpolation followed by a  $3 \times 3$  convolution. We additionally performed a instance normalization (Ulyanov et al., 2016) and a nonlinear

Table 3. Decoder network architecture for image visualization from a feature embedding  $e$ .

| Layer | Decoder                                                                                                                         |
|-------|---------------------------------------------------------------------------------------------------------------------------------|
| FC1   | (512, $7 \times 7 \times 512$ )                                                                                                 |
| conv1 | $\left[ \begin{array}{c} 2 \times \text{Upsample} \\ 3 \times 3, 256 \\ \text{InstanceNorm} \\ \text{ReLU} \end{array} \right]$ |
| conv2 | $\left[ \begin{array}{c} 2 \times \text{Upsample} \\ 3 \times 3, 128 \\ \text{InstanceNorm} \\ \text{ReLU} \end{array} \right]$ |
| conv3 | $\left[ \begin{array}{c} 2 \times \text{Upsample} \\ 3 \times 3, 64 \\ \text{InstanceNorm} \\ \text{ReLU} \end{array} \right]$  |
| conv4 | $\left[ \begin{array}{c} 2 \times \text{Upsample} \\ 3 \times 3, 32 \\ \text{InstanceNorm} \\ \text{ReLU} \end{array} \right]$  |
| conv5 | $[3 \times 3, 3]$                                                                                                               |

ReLU for each block. The final output is a  $112 \times 112 \times 3$  image.

## References

- He, K., Zhang, X., Ren, S., and Sun, J. Deep residual learning for image recognition. In *Proceedings of the IEEE conference on computer vision and pattern recognition*, pp. 770–778, 2016.
- Ulyanov, D., Vedaldi, A., and Lempitsky, V. Instance normalization: The missing ingredient for fast stylization. *arXiv preprint arXiv:1607.08022*, 2016.
